# Supplementary material for: Deciphering of polycationic carbohydrate based non-viral gene delivery agents by ESI-LTQ-Orbitrap using CID/HCD pairwise tandem mass spectrometry
Source: Royal Society of Chemistry journal article supplement (doi:10.1039/c6ra14508f), 2016-01-01
Supplement: c6ra14508f1.pdf [file c6ra14508f1.pdf]

# Deciphering of polycationic carbohydrate based non-viral gene delivery agents by ESI-LTQ-Orbitrap using CID/HCD pairwise tandem mass spectrometry

*Cédric Przybylski\*<sup>†,‡</sup>, Juan M. Benito<sup>‡</sup>, Véronique Bonnet<sup>§</sup>, Carmen Ortiz Mellet<sup>‡</sup>, José M.  
García Fernández<sup>‡</sup>*

## Supplementary content

**Figure S1.** Curves representing CE<sub>50</sub> values as function of m/z values of the various carbohydrate derivatives in (A) CID and (B) HCD. p.2

**Figure S2.** Detailed losses occurring for agents 1 to 5 upon CID and/or HCD. p.3

A

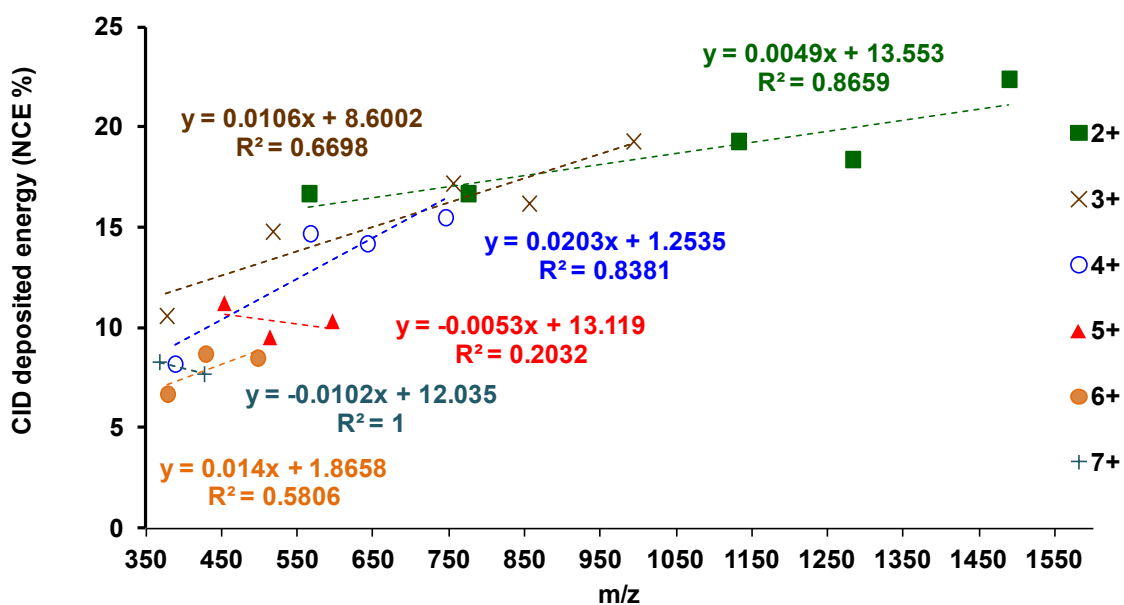

B

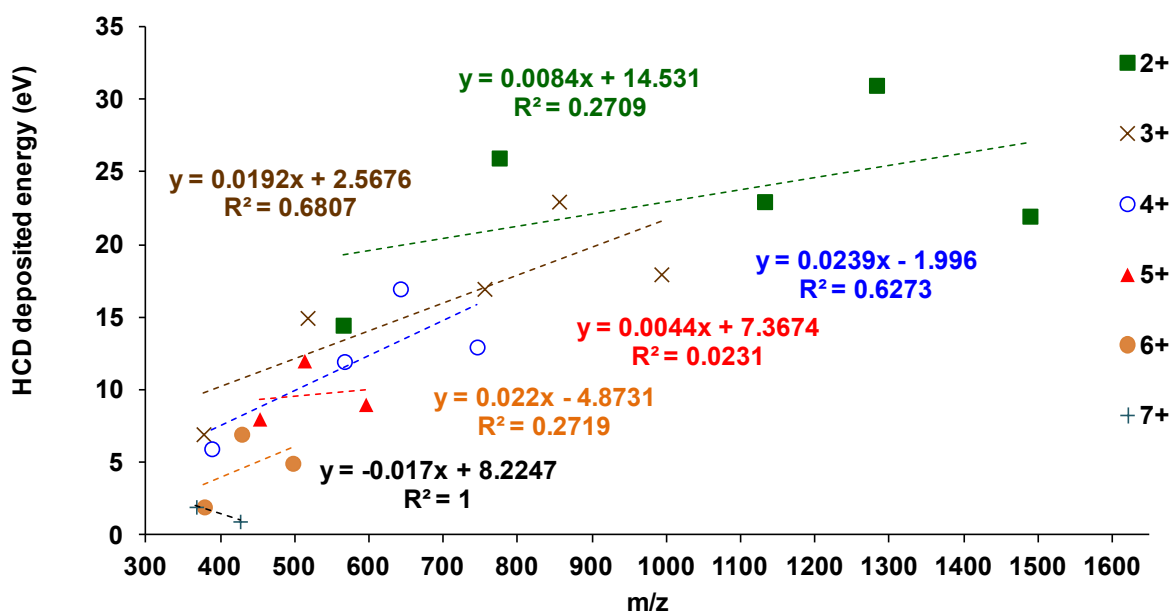

**Figure S1.** Curves representing  $CE_{50}$  values as function of m/z values of the various carbohydrate derivatives in (A) CID and (B) HCD.

Agent 1:

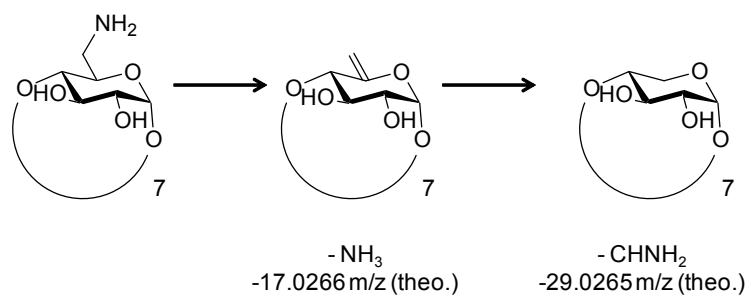

Agent 2:

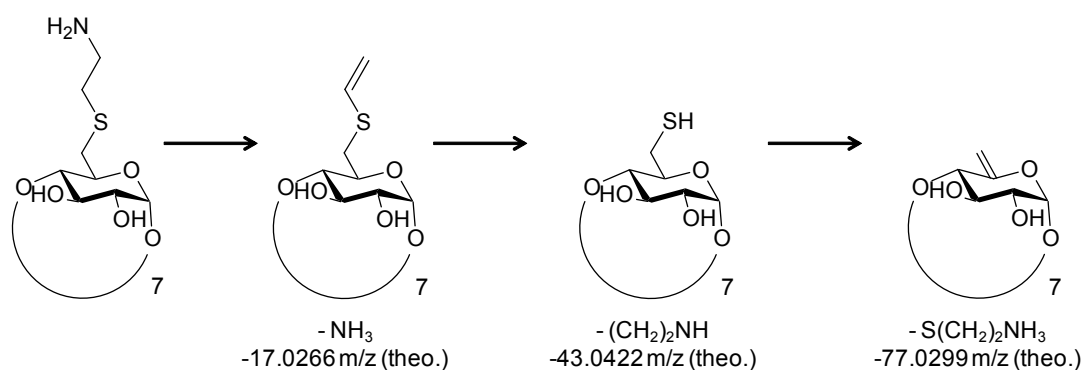

Agent 3:

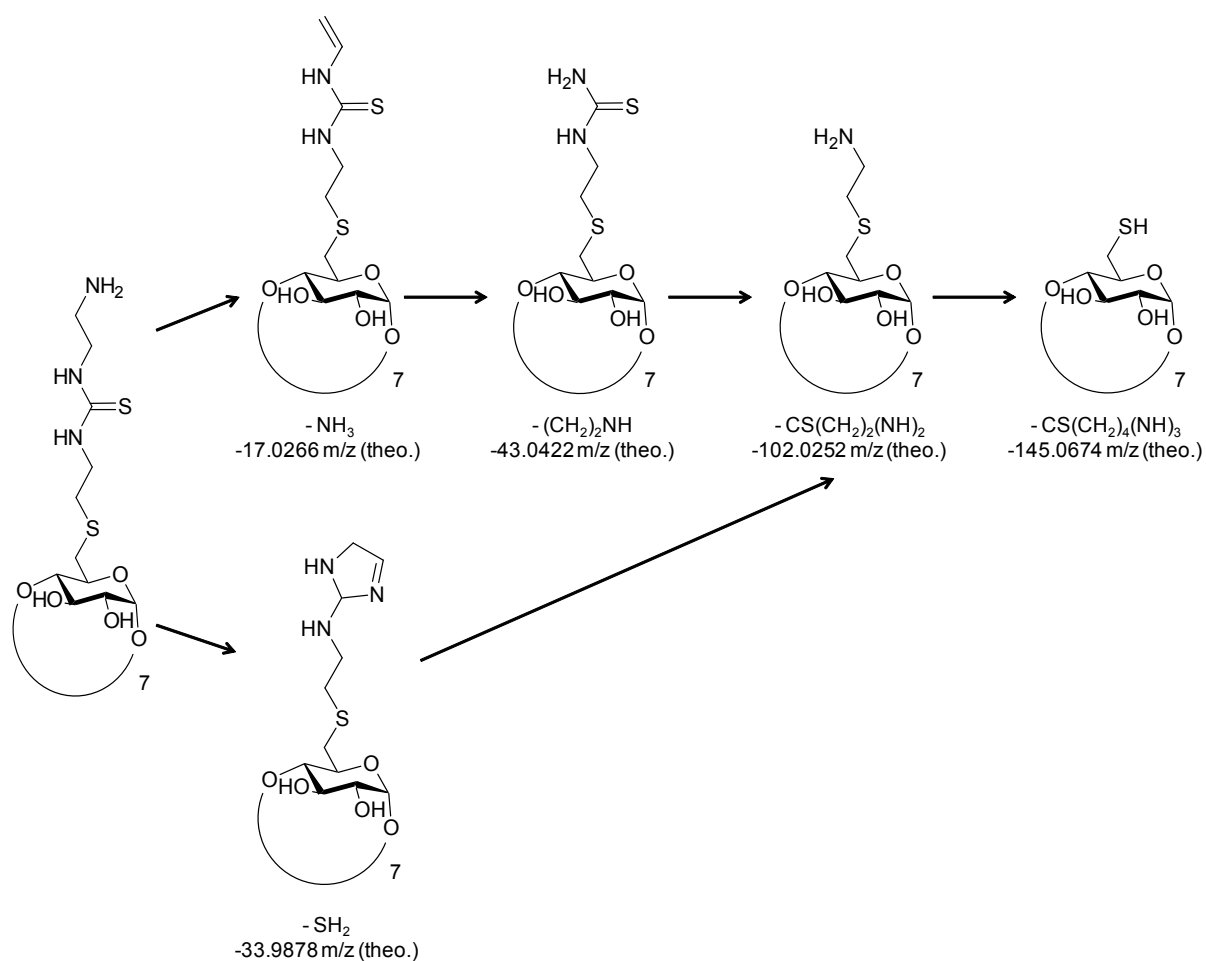

**Figure S2.** Detailed losses occurring for agents 1 to 5 upon CID and/or HCD.

Agent 4:

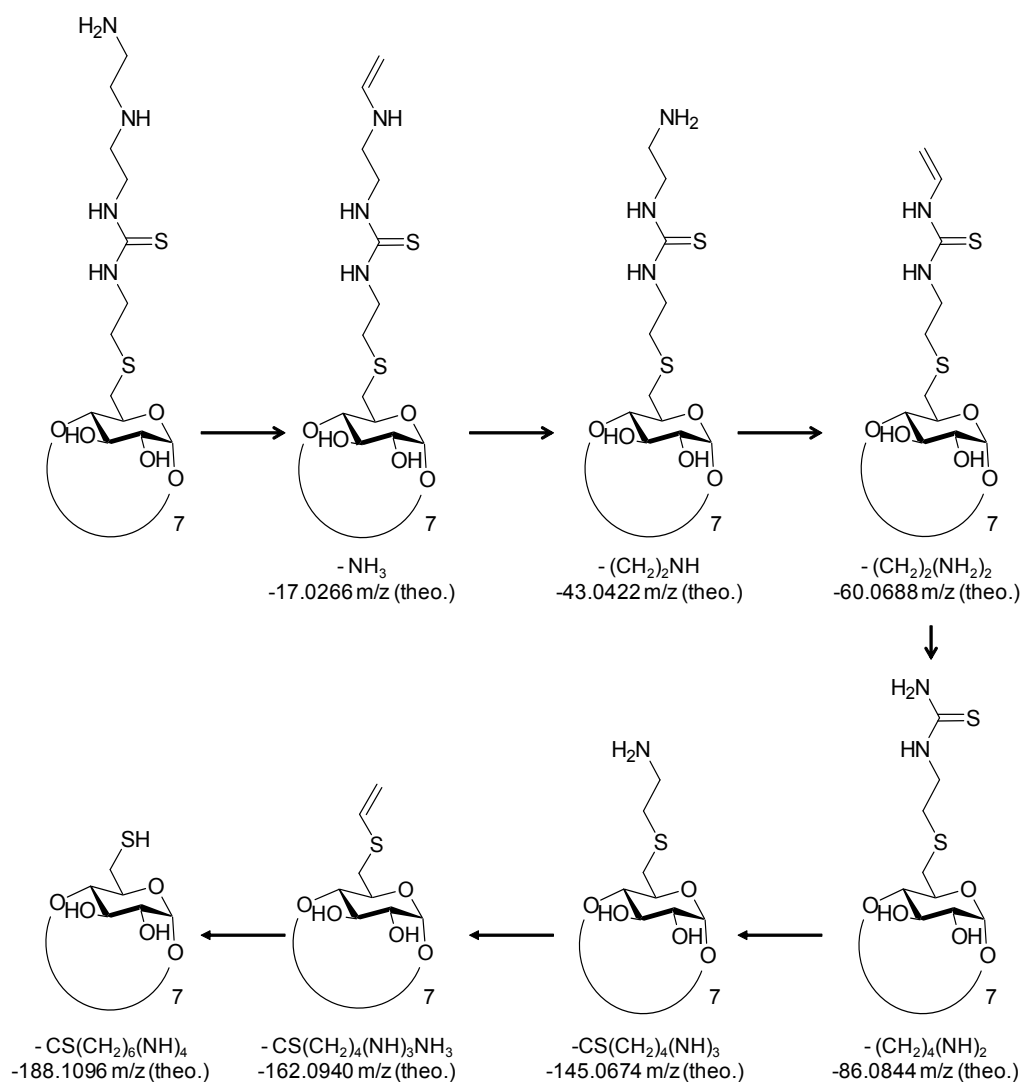

Agent 5:

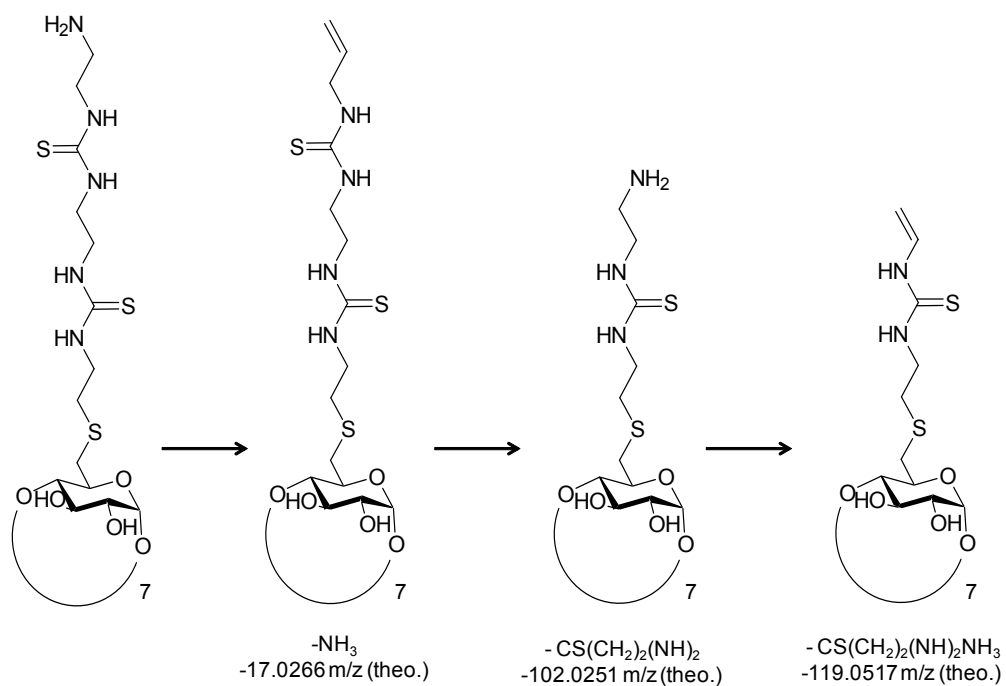

Figure S2. Continued.
